# Supplementary material
Source: Elsevier journal article supplement (https://publikationen.ub.uni-frankfurt.de/opus4/files/42274/mmc1.docx)
Supplement: mmc1 [file mmc1.docx]

**Appendix A**

**Supplementary Table 1: Primers used for single-cell RT-PCR.**

| **Gene ID** | **Forward sequence (5’ - 3’)** | **Reverse sequence (5’ - 3’)** |
| --- | --- | --- |
| *Acta2* | gaggcaccactgaaccctaa | tacatggcggggacattgaa |
| *Actb* | ccctaaggccaaccgtgaaa | cagcctggatggctacgtac |
| *Ccl3* | accatgacactctgcaacca | gaatcttccggctgtaggagaa |
| *Ccl4* | ctgtgctccagggttctca | agcaaagactgctggtctca |
| *Ccl5* | gtgcccacgtcaaggagta | gcggttccttcgagtgaca |
| *CD4* | aaagggacactgcatcaggaa | cccatcacctcacaggtcaa |
| *CD68* | atccccacctgtctctctca | ctgtactcgggctctgatgta |
| *CD8* | cagcaaggaaaacgaaggctac | gcagcactggcttggtagta |
| *CD19* | ccatcgagaggcacgtgaa | accactgggactatccatcca |
| *Cdh5* | aacgaggacagcaacttcac | tggcatgctcccgattaaac |
| *Col8a1* | ccagccccagtggtattaca | acagtattcccagcagctgta |
| *Cxcl10* | tgccgtcattttctgcctca | tcactggcccgtcatcgata |
| *EGFP* | aaggacgacggcaactacaa | ttcagctcgatgcggttca |
| *Fn1* | cgtcattgccctgaagaaca | aagggtaaccagttggggaa |
| *Gapdh* | agacggccgcatcttctt | ttcacaccgaccttcaccat |
| *Hgf* | catcaaatgccagccttggaa | tctttaccgcgatagctcgaa |
| *Hprt* | cagtacagccccaaaatggtta | agtctggcctgtatccaaca |
| *Icam1* | agggctggcattgttctcta | tgtcgagctttgggatggta |
| *Igf1* | gagctggtggatgctcttca | ctccgaatgctggagccata |
| *Il10* | aaaggaccagctggacaaca | taaggcttggcaacccaagta |
| *Il1b* | ctctccacctcaatggacagaa | ttgtcgttgcttggttctcc |
| *Il6* | cgatgatgcacttgcagaaa | actccagaagaccagaggaa |
| *Itgam* | aagcagctgaatgggaggac | gccccattggttttgtgaaaca |
| *Mkl1* | agtcccgagtcagtgatcca | ggagccattgggagttgagaa |
| *Mkl2* | tcctgtggattcgagtgtca | tcgccatgagtgtgaggata |
| *Mmp2* | cgaggactatgaccgggata | gggcaccttctgaatttcca |
| *Mmp3* | agggtggatgctgtctttgaa | actgcgaagatccactgaagaa |
| *Myh11* | cccaagcagctaaaggacaa | aggcacttgcattgtagtcc |
| *Pdgfa* | tgtaacaccagcagcgtcaa | ggcttcttcctgacatactcca |
| *Pdgfb* | cggcctgtgactagaagtcc | tcaccgtccgaatggtcac |
| *Pdgfra* | caaagggaggacgttcaagac | tgcgtccatctccagattca |
| *Pdgfrb* | tggcgatgagaaagccatca | tctacatctcccagtgtctcca |
| *Ptgs2* | cttctccctgaagccgtaca | tgtcactgtagagggctttcaa |
| *Ptprc* | tgatgagggcagactgttcc | tcgggcatctttgatgggaa |
| *Smtn* | accgacgccagaactttgaa | cgcaccatgtcctctgtatcc |
| *Tagln* | ggaaactaccgtggagatccc | tgcagttggctgtctgtgaa |
| *Tgfb1* | gctgcgcttgcagagattaa | gtaacgccaggaattgttgcta |
| *Tgfb2* | gcccatatctatggagttcagaca | agcggaagcttcgggattta |
| *Tgfb3* | tcaggcccttgcccatac | ctctgggttcagggtgttgta |
| *Tgfbr1* | aattgctcgacgctgttcta | accgatggatcagaaggtaca |
| *Timp1* | tccccagaaatcaacgagacc | catttcccacagccttgaatcc |
| *Tnf* | gggtgatcggtccccaaa | tgagggtctgggccatagaa |
| *Vcam1* | cccaaacagaggcagagtgta | tgacccagatggtggtttcc |
| *Vegfa* | ccagcacataggagagatgag | ctggctttgttctgtctttctt |

Gene names: *Acta2*, α-smooth muscle actin; *Actb*, beta actin; *Ccl3*, *Ccl4* and *Ccl5*, chemokine (C-C motif) ligand 3, 4 and 5; *Cdh5*, cadherin 5; *Col1a2, Col3a1* and *Col8a1*, collagen isoforms type I α2, type III α1 and type VIII α1; *Cxcl10*, chemokine (C-X-C motif) ligand 10; *EGFP*, enhanced green fluorescent protein; *Fn1*, fibronectin 1; *Hgf*, hepatocyte growth factor; *Icam1*, intracellular adhesion molecule; *Igf1*, insulin-like growth factor 1, *Il10*, interleukin-10; *Il1b*, interleukin-1b; *Il6*, interleukin-6; *Itgam*, integrin alpha M; *Mkl1* and *Mkl2*, myocardin-like 1 and 2; *Mmp2* and *Mmp3*, matrix metallopeptidase 2 and 3; *Msr1*, macrophage scavenger receptor 1; *Myh11*, myosin heavy chain smooth muscle; *Pdgfa* and *Pdgfb*, platelet-derived growth factor α and β; *Pdgfra* and *Pdgfrb*, platelet-derived growth factor receptor α and β; *Ptgs2*, cyclooxygenase 2; *Ptprc*, protein tyrosine phosphatase receptor type C; *Smtn*, smoothelin; *Tagln*, transgelin; *Tgfb1, Tgfb2* and *Tgfb3*, transforming growth factor β1, 2 and 3; *Tgfbr1*, transforming growth factor β receptor 1; *Timp1*, tissue inhibitor of metalloproteinase 1; *Tnf*, tumor necrosis factor; *Vcam1*, vascular cell adhesion molecule; *Vegfa*, vascular endothelial growth factor A.

**Supplementary Table 2: Recombination efficiency in SM and myeloid reporter mice**.

|  |  |  | **SM**  **reporter** | **Myeloid reporter** |
| --- | --- | --- | --- | --- |
| **Tissue** | **Cell markers** | **Cell**  **type** | **EGFP expression**  **(%)** | |
| **Aortic wall** | SMMHC | **Smooth muscle** | 98 | 0 |
| CD68 | **Macrophages** | 0.0 | 92 |
| **Peritoneal cavity** | CD11b  F4/80 | **Macrophages** | n.d. | 95 |
| **Bone marrow** | CD45  B220 | **B cells** | 0.1 | n.d. |
| CD4  CD8 | **T cells** | 0.0 | n.d. |
| CD11b  Ly6G | **Neutrophils** | 0.1 | 75 |
| CD11b  F4/80 | **Macrophages** | 0.0 | 98 |
| CD11b  Ly6G  Ly6C | **Monocytes** | 0.0 | 30 |
| **Blood** | CD45  B220 | **B cells** | 0.0 | 0.5 |
| CD4  CD8 | **T cells** | 0.0 | 0.5 |
| CD11b  Ly6G | **Neutrophils** | 0.0 | 90 |
| CD11b  Ly6G  Ly6C | **Monocytes** | 0.0 | 30 |

Shown are average percentages of EGFP expression in aortic wall, peritoneal cavity, bone marrow and blood from SM and myeloid reporter mice. Aortic wall expression was determined by SMMHC and CD68 immunostaining. Single cell suspensions from peritoneal cavity, bone marrow and blood were stained for hematopoietic markers: CD45 and B220 (B cells), CD8 and CD4 (T cells), and CD11b, Ly6C, Ly6G, and F4/80 (myeloid markers). n.d. indicates not determined. 6-weeks old SM reporter male mice (*n*=4) were treated with tamoxifen for 5 consecutive days and two weeks after the last injection animals were sacrificed and bone marrow and blood were isolated (myeloid reporter mice *n*=3).
